## Exploring RNA modifications in infectious non-coding circular RNAs

Pavel Vopalensky, <sup>†</sup> Anton Škríba, <sup>†</sup> Michela Chiumenti, <sup>‡</sup> Lucia Ďuričková, <sup>†#</sup> Anna Šimonová, <sup>†</sup> Ondřej Lukšan, <sup>†</sup> Francesco di Serio, <sup>‡</sup> Beatriz Navarro, <sup>‡\*</sup> Hana Cahova<sup>†\*</sup>

<sup>†</sup> Institute of Organic Chemistry and Biochemistry of the CAS, Flemingovo náměstí 2, Prague 6, Czechia

<sup>‡</sup> Institute for Sustainable Plant Protection (IPSP), National Research Council of Italy (CNR), Via Amendola 165/A, Bari, Italy

<sup>#</sup> Charles University, Faculty of Science, Department of Cell Biology, Viničná 7, Prague 2, Czechia

\* correspondence to: [beatriz.navarro@cnr.it](mailto:beatriz.navarro@cnr.it) and [cahova@uochb.cas.cz](mailto:cahova@uochb.cas.cz)

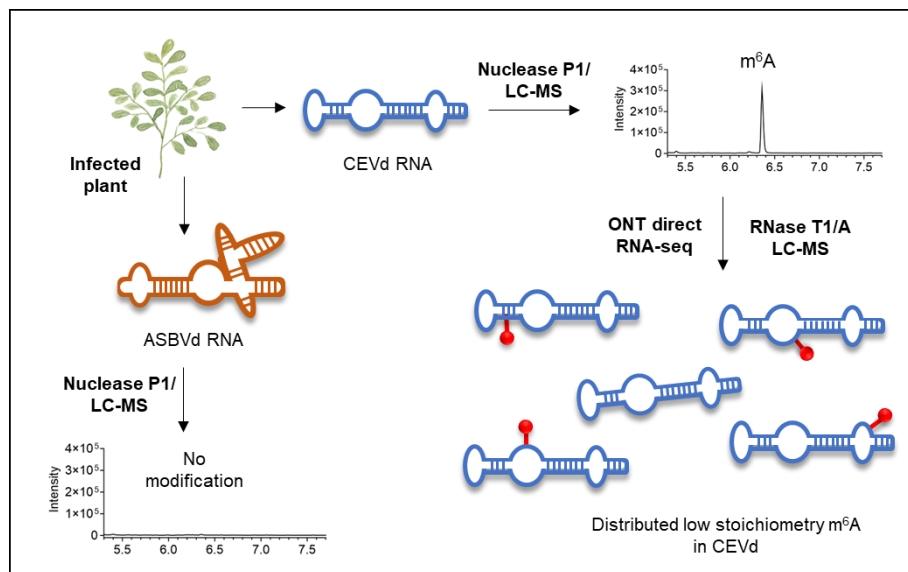

### Abstract

Viroids, small circular non-coding RNAs, act as infectious pathogens in higher plants, demonstrating high stability despite consisting solely of naked RNA. Their dependence of replication on host machinery poses the question of whether RNA modifications play a role in viroid biology. Here, we explore RNA modifications in the avocado sunblotch viroid (ASBVd) and the citrus exocortix viroid (CEVd), representative members of viroids replicating in chloroplasts and the nucleus, respectively, using LC-MS and Oxford Nanopore Technology (ONT) direct RNA sequencing. Although no modification was detected in ASBVd, CEVd contained approximately one m<sup>6</sup>A per RNA molecule. ONT sequencing predicted several m<sup>6</sup>A positions, which were, however, not confirmed by RNase T1/A treatment and LC-MS, likely because of low methylation level at each potential position. Our results suggest that m<sup>6</sup>A is not in one specific position and is distributed in CEVd sequence at low stoichiometries presumably in the predicted sites.

**Keywords:** viroid, circular RNA, RNA modification, mass spectrometry, direct RNA sequencing

### Introduction

RNA is a key molecule in all cellular processes and plays a plethora of roles. The functional information in RNA is encoded in three layers: sequence, structure and chemical modifications. To date, there are approximately 170 RNA modifications discovered across all domains of life<sup>1</sup>. The role of RNA modifications is well described for abundant RNA species such as rRNA<sup>2</sup> and tRNA<sup>3,4</sup>; however, it is not as well understood in other RNA types (e.g. mRNA, regulatory RNA and viral RNA)<sup>5,6</sup>. The low

abundance of these RNAs and contamination from rRNA and tRNA hinders their in-depth analysis<sup>7,8</sup>. Viruses are good model systems for studying RNA modifications thanks to their intrinsically simple organization and amplification in infected cells<sup>9</sup>. So far, the best-described modifications in viral RNA are 6-methyladenosine (m<sup>6</sup>A)<sup>10,11</sup> and 2'-O-methylnucleoside (Nm)<sup>12</sup>, which have been detected, for example, in HIV-1. Other modifications, such as 1-methyladenosine (m<sup>1</sup>A) or 5-methylcytidine (m<sup>5</sup>C), were detected rather in viral co-packed tRNA in HIV-1<sup>13</sup> and tRNA fragments in members of the *Picornavirales*<sup>14</sup>.

Subviral agents infecting plants, such as viroids, offer even better opportunities to identify new RNA modifications and their potential biological roles. Viroid RNA does not code for proteins and the catalytical activity needed for their infectivity is provided either by their own ribozyme structure (family *Avsunviroidae*) or by host enzymes, mimicking structural features of host nucleic acid. The replication of viroids can take place either in the nucleus (family *Pospiviroidae*) or in chloroplasts (family *Avsunviroidae*)<sup>15</sup> (Figure 1A). Despite being naked circular RNAs of small size (250–450 nt), viroids are highly stable in natural environments. The stability and intimate relationship between sequence, structure and function poses the question whether RNA modifications play a role in viroid biology.

So far, attempts to identify RNA modifications in viroids have employed the bisulfite sequencing, which did not reveal any m<sup>5</sup>C in viroid RNA<sup>16,17</sup>. Additionally, bioinformatic prediction was performed, but without further experimental confirmation<sup>18</sup>. To date, however, no systematic search for RNA modifications in viroids has been reported. In this study, we investigated the presence of the most common RNA modifications<sup>7</sup> in two representative members of both viroid families by employing liquid chromatography–mass spectrometry (LC–MS) analysis and Oxford Nanopore Technology (ONT) direct RNA sequencing. Whereas the avocado sunblotch viroid (ASBVd, *Avsunviroidae*) did not contain any of the RNA modifications screened for, we did detect the m<sup>6</sup>A methylation in the citrus exocortix viroid (CEVd, *Pospiviroidae*).

## Results

Viroids are classified into the families *Avsunviroidae* and *Pospiviroidae*, which include members replicating in the chloroplasts and in the nucleus, respectively (Figure 1A). We selected the viroids ASBVd (*Avsunviroidae*) and CEVd (*Pospiviroidae*), which are known to accumulate at high levels in their natural or experimental host plants (*Persea americana* and *Gynura aurantiaca*, respectively) as representative members of each family to screen for modifications in viroid RNAs. We carried out our investigation on viroid circular RNA forms isolated from tissues infected with these viroids by applying a purification protocol consisting of the following two steps: (i) preparation of extracts enriched in highly structured RNAs by chromatography on CF11 cellulose in the presence of 35% EtOH<sup>19</sup> and (ii) separation of CF11 RNAs by double polyacrylamide gel electrophoresis (PAGE) consisting of a non-denaturing electrophoresis followed by a denaturing electrophoresis. The latter electrophoresis separated linear RNAs from circular viroid RNAs that could be easily recovered from the gel. This approach allowed us to obtain highly purified viroid circular RNA, reducing contamination by host RNA (Figure S1). After digestion of the gel-purified circular viroid RNAs (hereinafter referred to as cCEVd and cASBVd) by nuclease P1 and alkaline phosphatase into nucleosides, LC–MS analysis (Figure 1B) was performed to screen for the eleven most common modifications, namely 2'-O-methyladenosine (Am), m<sup>6</sup>A, 6-methyl-2'-O-methyladenosine (m<sup>6</sup>Am), m<sup>1</sup>A, 2'-O-methylcytidine (Cm), m<sup>5</sup>C, 3-methylcytidine (m<sup>3</sup>C), 2'-O-methylguanosine (Gm), 2-methylguanosine (m<sup>2</sup>G), 7-methylguanosine (m<sup>7</sup>G) and inosine (I) (Figure 1C, Figure S2, Table S6). Out of these, we observed m<sup>6</sup>A RNA modification signal in cCEVd-digested RNA (Figure 1D–E). This signal was observed in all four replicates tested. By contrast, no RNA modification was detected in the digested cASBVd.

To exclude the possibility that m<sup>6</sup>A comes from a host RNA molecule co-migrating with CEVd RNA, we performed a parallel control experiment. We prepared *in vitro*-transcribed CEVd RNA (IVT-CEVd) by *in vitro* transcription by T7 RNA polymerase (see the supplementary material) with diadenosine diphosphate (Ap<sub>2</sub>A) included in the mixture to serve as a 5' RNA cap. Uncapped RNA was degraded using 5' polyphosphatase and Terminator exonuclease. The presence of the Ap<sub>2</sub>A RNA cap enables efficient ligation (circularization) by truncated T4 RNA ligase 2. The non-circularized forms remaining after ligation were degraded using RNase R, resulting in pure circular viroid RNA. IVT-CEVd migrates exactly as cCEVd from infected tissue but does not contain any RNA modification. Therefore, IVT-CEVd was spiked in the RNA (the fraction consisting of highly structured RNAs) isolated from non-infected *Gynura* plants and subsequently recovered by the same double PAGE procedure used to isolate cCEVd from infected plants (Figure S1). LC-MS analysis of this IVT-CEVd RNA did not detect any m<sup>6</sup>A, thus excluding the possibility that the m<sup>6</sup>A signal observed in cCEVd RNA came from co-migrating host RNA (Figure 1D).

The quantified amount of detected m<sup>6</sup>A corresponds to 0.5–1.2% of all adenosines (75 A in the 371 nt long CEVd RNA), which would approximately mean 0.5–1 m<sup>6</sup>A per one molecule of CEVd RNA. Given this fact, we decided to explore whether this modification was present in a specific position or whether it was distributed over the viroid RNA sequence. Because traditional sequencing methods used for the identification of m<sup>6</sup>A position (e.g. MeRIP<sup>20</sup> or m<sup>6</sup>A-seq<sup>21</sup>), do not provide single-nucleotide resolution or require a large amount of input material, like the miCLIP protocol does<sup>22</sup>, we employed ONT direct RNA sequencing in combination with published m<sup>6</sup>A prediction algorithms providing single-nucleotide resolution<sup>23</sup>. We used IVT-CEVd to establish the ONT sequencing protocol and to provide a control dataset required by most prediction algorithms (Figure 2A). First, we optimized the ratio of Zn<sup>2+</sup> ions to RNA needed for a single cleavage site to gain mostly full-length reads (Figure 2B). The linearized RNA was polyadenylated and sequenced employing the ONT RNA002 and 9.4.1 flow cell or ONT RNA004 and RNA flow cell, producing typically more than 25 thousand reads (Figure 2C). Three IVT-CEVd samples were sequenced using two different templates starting from two different positions within the viroid sequence (Figure S3, see the supplementary material).

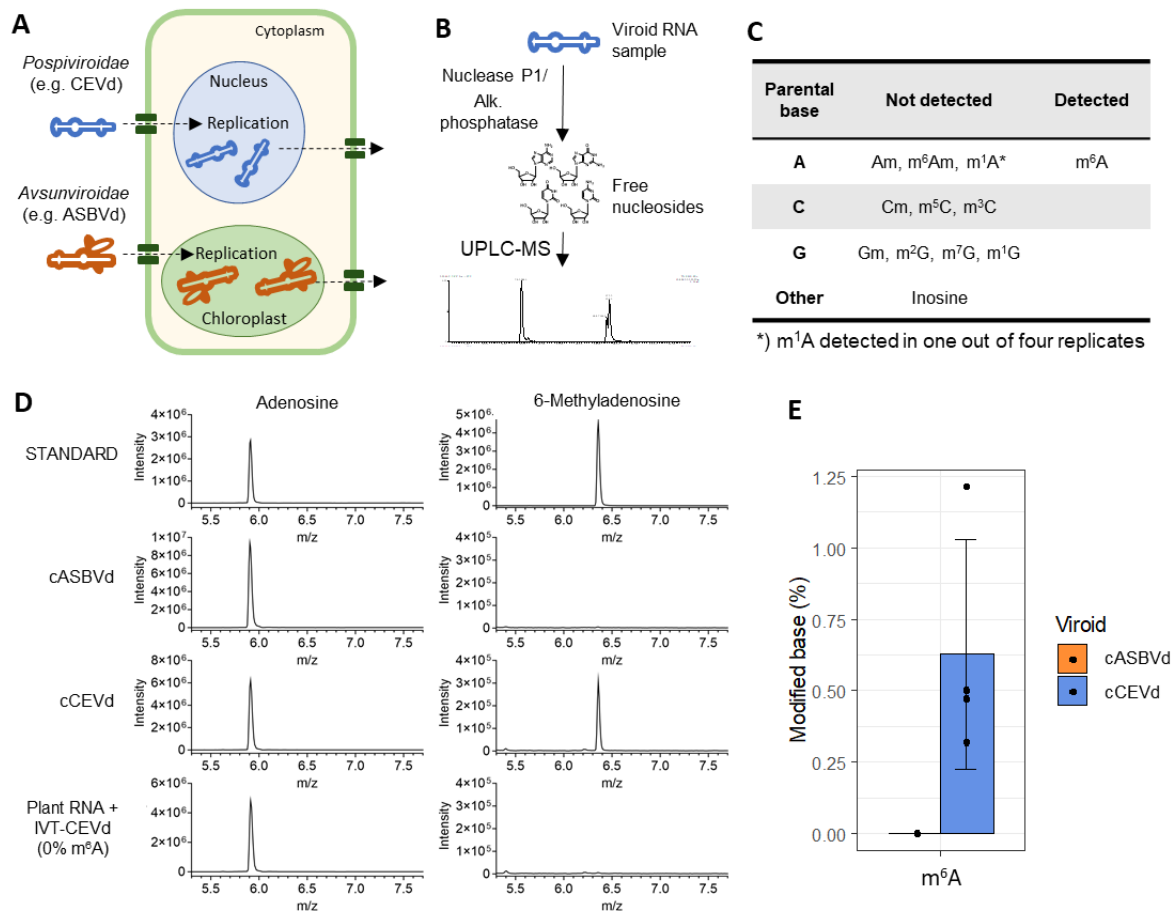

**Figure 1: Identification of RNA modifications in viroid RNA.** (A) The citrus exocortix viroid (CEVd, family Pospiviroidae) replicates in the nucleus whereas the avocado sunblotch viroid (ASBVd, family Avsunviroidae) replicates in chloroplasts. (B) Double PAGE-purified viroid circular RNA sample (cCEVd, cASBVd) was digested by nuclease P1 and alkaline phosphatase into nucleoside form. The resulting mixture was subjected to LC–MS analysis. (C) Out of eleven types of RNA modification screened for, only m<sup>6</sup>A was reproducibly detected in cCEVd RNA. (D) LC–MS extracted ion chromatograms of adenosine and 6-methyladenosine from nuclease P1-digested cASBVd, cCEVd and IVT-CEVd (negative control) RNA spiked in the RNA of healthy plants. (E) Quantification of m<sup>6</sup>A in cASBVd and cCEVd RNA samples (measured in biological triplicates). The error bar represents the standard deviation; the black dots are individual values from each replicate. The y-axis represents the percentage of m<sup>6</sup>A across all adenosines within the RNA sequence.

Sequencing of samples from CEVd-infected plants was performed using gel-purified cCEVd, previously analysed by LC–MS (cCEVd #1) and a highly structured fraction of RNA obtained by CF-11 chromatography and treated with RNase R (HS-RNA #1). Importantly, cCEVd is expected to contain highly purified circular viroid RNAs, HS-RNA is only enriched in circular RNAs and contains also host RNAs. Both samples were sequenced using the same procedure.

To predict the position of m<sup>6</sup>A in CEVd RNA, we applied several published algorithms (DRUMMER<sup>25</sup>, xPORE<sup>26</sup> and Nanocompore<sup>27</sup>) on these four datasets (cCEVd #1, HS-RNA #1 and the negative controls IVT-CEVd #1 and #2). For each algorithm, we set parameter thresholds based on a recent benchmarking study<sup>23,28</sup>. We observed single-nucleotide polymorphisms (SNPs) due to the variability of naturally occurring viroid populations<sup>29</sup> and several artefacts, such as “circularization scars”, caused by different non-templated nucleotides at the 3’ end of *in vitro* transcripts (Figure S4). After filtering out these artefacts, we identified three potential sites of m<sup>6</sup>A, namely positions A6, A353 and A360 (Figure 2D). We also used the recently released ONT RNA004 technology to sequence other double PAGE-purified circular CEVd RNA samples from infected plants (cCEVd #2) and a control IVT-CEVd (IVT-CEVd #3) (Table S7). The novel base calling algorithm by ONT, again, predicted two of these three

positions as the most frequently modified ones. Interestingly, only 0.3% of all reads belonged to different host RNAs, in cCEVd #1 and cCEVd #2, the two double PAGE-purified CEVd samples, confirming the purity of the samples and providing further evidence that m<sup>6</sup>A must come from cCEVd RNA (Table S7).

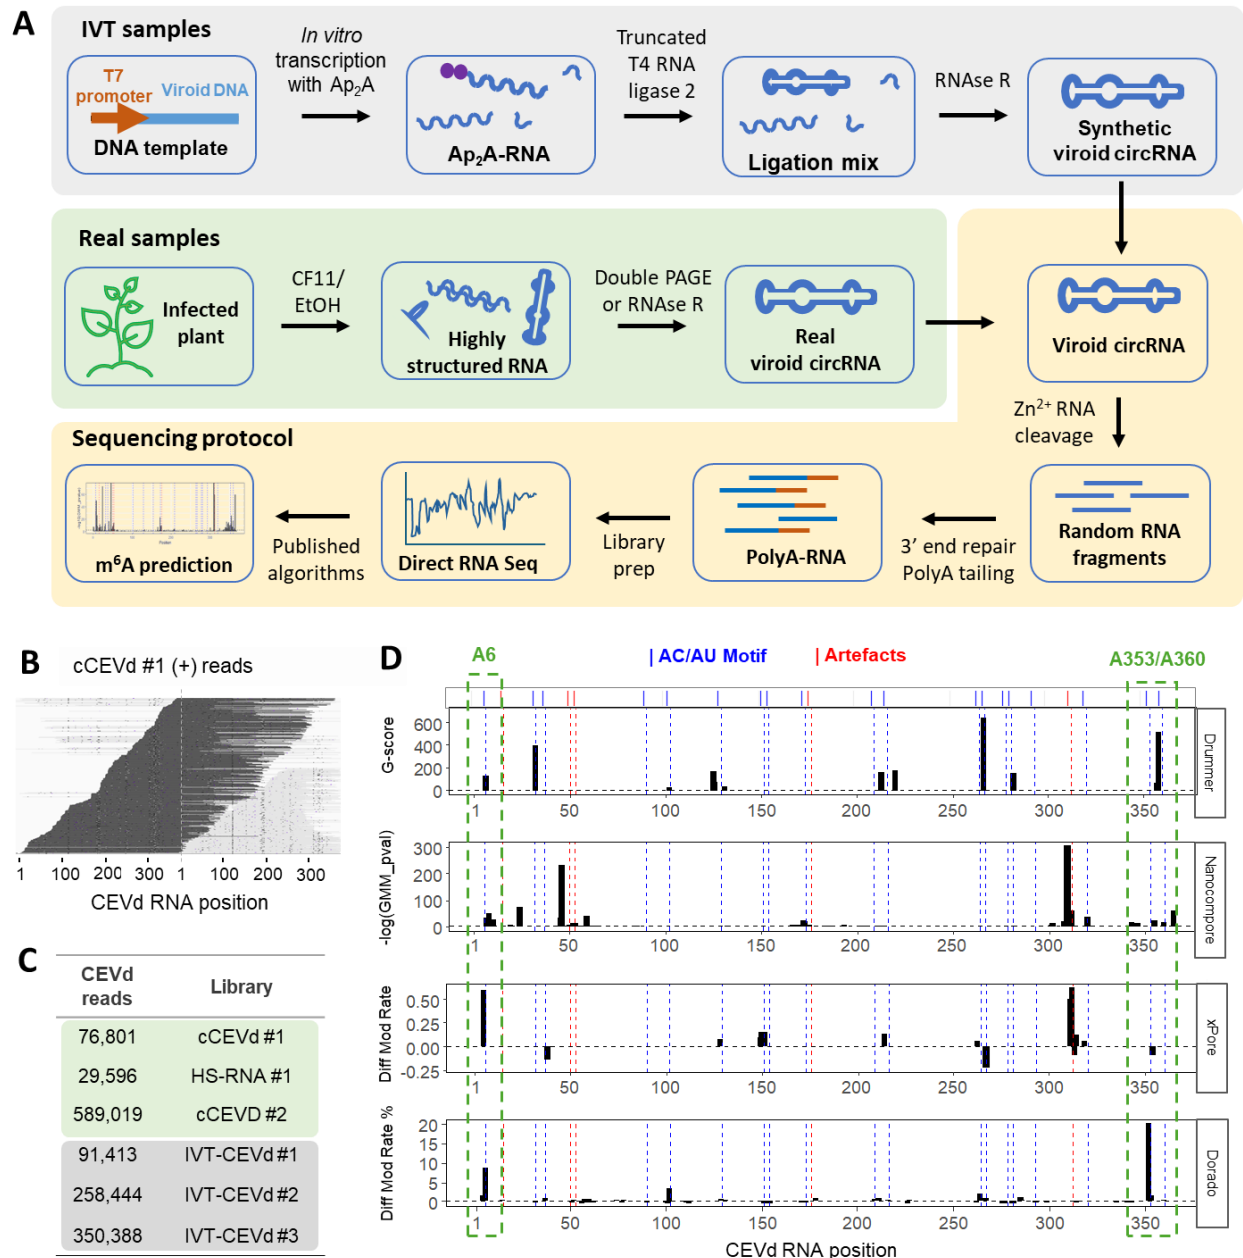

**Figure 2: Identification of m<sup>6</sup>A position by ONT direct RNA sequencing** (A) Overview of the sample preparation procedure (IVT-CEVd samples – grey background, CEVd samples from plant tissues – green background, sequencing protocol – yellow background.) (B) Alignment of CEVd reads from a typical run against the reference CEVd sequence, visualized using Integrative Genomics Viewer<sup>24</sup>; the reference sequence is dimerized to enable the visualization of reads mapped to a circular sequence. A uniform read length of ~ 370 nt was observed, corresponding to CEVd RNA linearized by a single cleavage. Distributed read starts / ends along the reference sequence suggests a random position of circular RNA cleavage. (C) ONT sequencing reads mapping to the CEVd sequence for each experiment (see also Table S7). (D) Prediction of m<sup>6</sup>A sites by multiple independent algorithms. The blue dashed lines indicate the sites of the AC / AU dinucleotide. The red dashed lines indicate the positions of SNPs and “scars” causing high falsely positive m<sup>6</sup>A prediction scores at several positions (see Figure S4 for details). DRUMMER, Nanocompore and xPore prediction was based on cCEVd #1, HS-RNA #1 / IVT-CEVd #1 and #2 samples sequenced with RNA002 chemistry whereas Dorado m<sup>6</sup>A prediction was performed with cCEVd #2 / IVT-CEVd #3 samples sequenced with

*RNA004 chemistry. The candidate sites A6, A353 and A360 (indicated by the green dashed boxes) were selected based on their scoring agreement across all four prediction approaches.*

To confirm the predicted position of m<sup>6</sup>A, we employed sequence specific cleavage by specific RNases combined with LC–MS of the resulting oligonucleotides. The cCEVd was digested by RNase T1 or RNase A, which cleave after a G and a U/C nucleotide, respectively (Figure 3A). This digestion generates a mixture of oligonucleotides, the composition of which is easy to predict from the CEVd sequence variant (GenBank ID: PP446493, infecting the source plants of *G. aurantiaca*) (Figure 3B, Table S8 -S9). The sensitivity of LC–MS decreases with the length of the oligonucleotide. In fact, no signal of oligonucleotides (methylated or non-methylated) longer than 8 nt was detectable in an IVT-CEVd transcript containing 70% of m<sup>6</sup>A (IVT-CEVd 70% m<sup>6</sup>A) (Figure 3C–D, Figure S5). However, digestion with at least one of the two RNases produces at least one oligonucleotide with a maximum length 7 nt from each AU or AC motif, which is the core of the recognition sequence of m<sup>6</sup>A RNA methyltransferases in plants<sup>30</sup> (Figure 3B), allowing to ultimately confirm or exclude the presence of the m<sup>6</sup>A methylation at each position of interest. First, we focused on predicted positions (A6, A353 and A360) and then we searched for the mass of respective oligonucleotides in their unmethylated and monomethylated versions. As standards we used IVT-CEVd 70% m<sup>6</sup>A digested in the same way as the gel-purified CEVd from infected tissues (cCEVd) (Figure 3C-D, Figure S5). Surprisingly, we did not observe any signal of methylated oligonucleotides containing any of the three predicted positions in the cCEVd RNA sample (Figure 3C-D, Figure S5). We therefore extended the analysis to all oligonucleotides containing AU or AC motif (Figure 3B, Figure S6)<sup>30</sup>. Also, in this case, we did not identify any methylated oligonucleotides in our analysis (Figure S5). Extending the search for methylation to all other adenosine-containing oligonucleotides (data not shown) did not reveal the presence of m<sup>6</sup>A either. This finding suggests that the m<sup>6</sup>A detected by LC–MS, using nuclease P1-digested cCEVd RNA, is not present at a single position in the viroid but might instead be distributed at lower stoichiometries at multiple specific positions (presumably those predicted by direct ONT sequencing), impairing detection by the RNase / LC–MS method, considering the sensitivity of our LC-MS system.

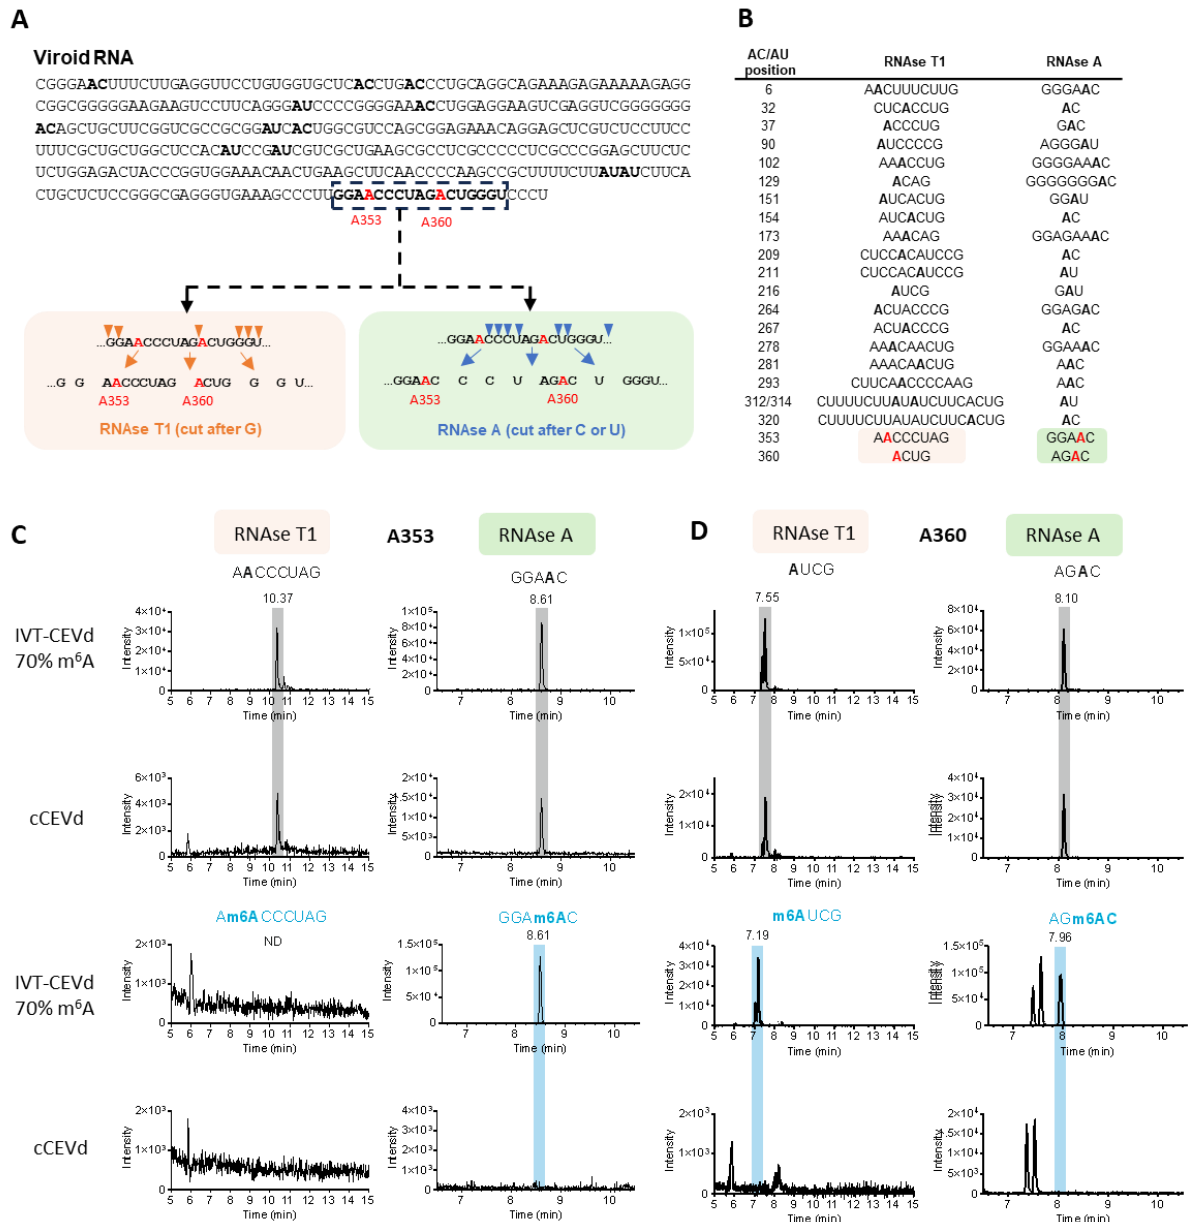

**Figure 3: Verification of candidate m<sup>6</sup>A positions by the RNase / LC-MS approach.** (A) Purified circular form of CEVd (cCEVd or IVT-CEVd) is digested by RNase T1 or RNase A, which cleave the RNA after each G or C/U nucleotide, respectively, generating a mixture of specific short oligonucleotides for LC-MS analysis. Given the different specificity of the two enzymes, each candidate position is contained in a unique combination of oligonucleotides from the two digests. (B) The sequences of the resulting RNA oligonucleotides from digesting the CEVd RNA. Only oligonucleotides containing the AC/AU dinucleotide motif are listed. Note that the specific site of the modified A position could be identified by the combination of both RNases. However, for example in the cases of A264 and A267, which are contained in the same oligonucleotide produced by RNase T1, they could be distinguished by two different oligonucleotides produced by RNase A digestion. (C) Representative LC-MS extracted ion chromatograms of unmodified (peaks highlighted by grey box) and m<sup>6</sup>A-modified (peaks highlighted by blue box) oligonucleotides at candidate sites A353 and A360. IVT CEVd (0 and 70% m<sup>6</sup>A) was used as a positive control. For extracted ion chromatograms of all other positions listed in Fig. 3B, see Table S8-S9 Figure S5.

In summary, we explored the presence of RNA modifications in two viroids that are representative members of the two viroid families, employing LC-MS and ONT RNA sequencing. Although we did not detect any of the most common RNA modification in chloroplast-replicating ASBVd, we observed m<sup>6</sup>A in the nucleus-replicating CEVd. This finding is in agreement with the fact that m<sup>6</sup>A RNA

monomethyltransferases are mainly reported to occur in the nucleus<sup>31</sup> but have not been described in chloroplasts<sup>32</sup>. LC–MS analysis revealed 0.5–1 m<sup>6</sup>A per CEVd RNA molecule, indicating that m<sup>6</sup>A might be present at one specific position. To identify the position of m<sup>6</sup>A, we employed ONT direct sequencing in combination with several m<sup>6</sup>A prediction algorithms. These algorithms predicted three candidate positions. However, further experiments with RNase-specific cleavage followed by LC–MS analysis of the resulting oligonucleotides did not confirm these sites nor any other methylated adenosine within the CEVd RNA. These findings apparently contradict the initial observation of approx. one m<sup>6</sup>A in LC–MS analysis after nuclease P1 digestion. The most probable explanation is that m<sup>6</sup>A is distributed across more than one site at a lower percentage, adding up to the observed 0.5–1 m<sup>6</sup>A per viroid molecule. This distribution hinders the detection of methylated oligonucleotides by the RNase T1- / RNaseA-based method, which is generally less sensitive than the nuclease P1-based technique detecting single nucleosides. All our observations suggest that RNA methylation of CEVd by RNA methyltransferases is a process occurring in more than one positions, presumably at the positions predicted from the ONT direct RNA sequencing. Moreover, at this stage, we cannot exclude that m<sup>6</sup>A occurs only transiently in just a fraction of CEVd molecules. This raises a question about the biological significance of the m<sup>6</sup>A methylation in CEVd. Our work is the first systematic study of RNA modifications in viroids and suggests that viroid RNA is not extensively modified.

#### **Acknowledgements:**

This work was funded as a bilateral scientific project between the Italian Research National Council (CNR) and the Czech Academy of Sciences (CAS) under the joint programme for the 2022–2024 triennium (CNR-22-21). We also acknowledge funding from the Operational Programme Johannes Amos Comenius (OP JAC) project RNA for Therapy, reg. No. CZ.02.01.01/00/22\_008/0004575 co-financed by the EU and the European Research Council Executive Agency (ERCEA) under the European Union's Horizon Europe Framework Programme for Research and Innovation (grant agreement No. 101041374 – StressRNaction). Views and opinions expressed are however those of the authors only and do not necessarily reflect those of the European Union. Neither the European Union nor the granting authority can be held responsible for them.

#### **Author contributions:**

P.V., A.Š., B.N., F.d.S. and H.C. designed the experiments and coordinated the project. P.V., A.Š., L.D., A.Š., and H.C. performed the experiments. P.V., M.C. and O.L. performed all bioinformatic analyses. H.C. a B.N. supervised the work. P.V., F.d.S., B.N. and H.C. wrote the paper.



## References

1. Boccaletto, P.; Machnicka, M. A.; Purta, E.; Piątkowski, P.; Bagiński, B.; Wirecki, T. K.; de Crécy-Lagard, V.; Ross, R.; Limbach, P. A.; Kotter, A.; Helm, M.; Bujnicki, J. M., MODOMICS: a database of RNA modification pathways. 2017 update. *Nucleic Acids Research* **2017**, *46* (D1), D303-D307.
2. Sloan, K. E.; Warda, A. S.; Sharma, S.; Entian, K. D.; Lafontaine, D. L. J.; Bohnsack, M. T., Tuning the ribosome: The influence of rRNA modification on eukaryotic ribosome biogenesis and function. *RNA Biol* **2017**, *14* (9), 1138-1152.
3. Wilkinson, E.; Cui, Y.-H.; He, Y.-Y., Roles of RNA Modifications in Diverse Cellular Functions. *Frontiers in Cell and Developmental Biology* **2022**, *10*.
4. Zhang, W.; Foo, M.; Eren, A. M.; Pan, T., tRNA modification dynamics from individual organisms to metaepitranscriptomics of microbiomes. *Mol Cell* **2022**, *82* (5), 891-906.
5. Shi, H.; Chai, P.; Jia, R.; Fan, X., Novel insight into the regulatory roles of diverse RNA modifications: Re-defining the bridge between transcription and translation. *Molecular Cancer* **2020**, *19* (1), 78.
6. Patrasso, E. A.; Raikundalia, S.; Arango, D., Regulation of the epigenome through RNA modifications. *Chromosoma* **2023**, *132* (3), 231-246.
7. Wiener, D.; Schwartz, S., The epitranscriptome beyond m6A. *Nature Reviews Genetics* **2021**, *22* (2), 119-131.
8. Ammann, G.; Berg, M.; Dalwigk, J. F.; Kaiser, S. M., Pitfalls in RNA Modification Quantification Using Nucleoside Mass Spectrometry. *Accounts of Chemical Research* **2023**, *56* (22), 3121-3131.
9. Potužník, J. F.; Cahová, H., It's the Little Things (in Viral RNA). *mBio* **2020**, *11* (5), e02131-20.
10. Kennedy, Edward M.; Bogerd, Hal P.; Kornepati, Anand V. R.; Kang, D.; Ghoshal, D.; Marshall, Joy B.; Poling, Brigid C.; Tsai, K.; Gokhale, Nandan S.; Horner, Stacy M.; Cullen, Bryan R., Posttranscriptional m6A Editing of HIV-1 mRNAs Enhances Viral Gene Expression. *Cell Host & Microbe* **2016**, *19* (5), 675-685.
11. Tirumuru, N.; Zhao, B. S.; Lu, W.; Lu, Z.; He, C.; Wu, L., N(6)-methyladenosine of HIV-1 RNA regulates viral infection and HIV-1 Gag protein expression. *Elife* **2016**, *5*.
12. Ringeard, M.; Marchand, V.; Decroly, E.; Motorin, Y.; Bennasser, Y., FTSJ3 is an RNA 2'-O-methyltransferase recruited by HIV to avoid innate immune sensing. *Nature* **2019**, *565* (7740), 500-504.
13. Šimonová, A.; Svojanovská, B.; Trylčová, J.; Hubálek, M.; Moravčík, O.; Zavřel, M.; Pávová, M.; Hodek, J.; Weber, J.; Cvačka, J.; Pačes, J.; Cahová, H., LC/MS analysis and deep sequencing reveal the accurate RNA composition in the HIV-1 virion. *Scientific Reports* **2019**, *9* (1), 8697.
14. Šimonová, A.; Romanská, V.; Benoni, B.; Škubník, K.; Šmerdová, L.; Procházková, M.; Spustová, K.; Moravčík, O.; Gahurova, L.; Pačes, J.; Plevka, P.; Cahová, H., Honeybee I flaviviruses Pack Specific tRNA Fragments from Host Cells in Their Virions. *Chembiochem* **2022**, *23* (17), e202200281.
15. Navarro, B.; Flores, R.; Serio, F. D., Advances in Viroid-Host Interactions. *Annual Review of Virology* **2021**, *8* (1), 305-325.
16. Di Serio, F.; Torchetti, E. M.; Daròs, J. A.; Navarro, B., Reassessment of Viroid RNA Cytosine Methylation Status at the Single Nucleotide Level. *Viruses* **2019**, *11* (4).
17. Domdey, H.; Jank, P.; Sängner, L.; Gross, H. J., Studies on the primary and secondary structure of potato spindle tuber viroid: products of digestion with ribonuclease A and ribonuclease T1, and modification with bisulfite. *Nucleic Acids Res* **1978**, *5* (4), 1221-36.
18. Marquez-Molins, J.; Juarez-Gonzalez, V. T.; Gomez, G.; Pallas, V.; Martinez, G., Occurrence of RNA post-transcriptional modifications in plant viruses and viroids and their correlation with structural and functional features. *Virus Res* **2023**, *323*, 198958.
19. Pallas, V.; Navarro, A.; Flores, R., Isolation of a Viroid-like RNA from Hop Different from Hop Stunt Viroid. *Journal of General Virology* **1987**, *68* (12), 3201-3205.

20. Meyer, Kate D.; Saletore, Y.; Zumbo, P.; Elemento, O.; Mason, Christopher E.; Jaffrey, Samie R., Comprehensive Analysis of mRNA Methylation Reveals Enrichment in 3' UTRs and near Stop Codons. *Cell* **2012**, *149* (7), 1635-1646.
21. Dominissini, D.; Moshitch-Moshkovitz, S.; Schwartz, S.; Salmon-Divon, M.; Ungar, L.; Osenberg, S.; Cesarkas, K.; Jacob-Hirsch, J.; Amariglio, N.; Kupiec, M.; Sorek, R.; Rechavi, G., Topology of the human and mouse m6A RNA methylomes revealed by m6A-seq. *Nature* **2012**, *485*, 201.
22. Linder, B.; Grozhik, A. V.; Olarerin-George, A. O.; Meydan, C.; Mason, C. E.; Jaffrey, S. R., Single-nucleotide-resolution mapping of m6A and m6Am throughout the transcriptome. *Nature Methods* **2015**, *12* (8), 767-772.
23. Zhong, Z.-D.; Xie, Y.-Y.; Chen, H.-X.; Lan, Y.-L.; Liu, X.-H.; Ji, J.-Y.; Wu, F.; Jin, L.; Chen, J.; Mak, D. W.; Zhang, Z.; Luo, G.-Z., Systematic comparison of tools used for m6A mapping from nanopore direct RNA sequencing. *Nature Communications* **2023**, *14* (1), 1906.
24. Robinson, J. T.; Thorvaldsdóttir, H.; Winckler, W.; Guttman, M.; Lander, E. S.; Getz, G.; Mesirov, J. P., Integrative genomics viewer. *Nature Biotechnology* **2011**, *29* (1), 24-26.
25. Abebe, J. S.; Price, A. M.; Hayer, K. E.; Mohr, I.; Weitzman, M. D.; Wilson, A. C.; Depledge, D. P., DRUMMER—rapid detection of RNA modifications through comparative nanopore sequencing. *Bioinformatics* **2022**, *38* (11), 3113-3115.
26. Pratanwanich, P. N.; Yao, F.; Chen, Y.; Koh, C. W. Q.; Wan, Y. K.; Hendra, C.; Poon, P.; Goh, Y. T.; Yap, P. M. L.; Chooi, J. Y.; Chng, W. J.; Ng, S. B.; Thiery, A.; Goh, W. S. S.; Göke, J., Identification of differential RNA modifications from nanopore direct RNA sequencing with xPore. *Nature Biotechnology* **2021**, *39* (11), 1394-1402.
27. Leger, A.; Amaral, P. P.; Pandolfini, L.; Capitanichik, C.; Capraro, F.; Miano, V.; Migliori, V.; Toolan-Kerr, P.; Sideri, T.; Enright, A. J.; Tzelepis, K.; van Werven, F. J.; Luscombe, N. M.; Barbieri, I.; Ule, J.; Fitzgerald, T.; Birney, E.; Leonardi, T.; Kouzarides, T., RNA modifications detection by comparative Nanopore direct RNA sequencing. *Nature Communications* **2021**, *12* (1), 7198.
28. Maestri, S.; Furlan, M.; Mulrone, L.; Coscujuela Tarrero, L.; Ugolini, C.; Dalla Pozza, F.; Leonardi, T.; Birney, E.; Nicassio, F.; Pelizzola, M., Benchmarking of computational methods for m6A profiling with Nanopore direct RNA sequencing. *Briefings in Bioinformatics* **2024**, *25* (2).
29. Codoñer, F. M.; Darós, J.-A.; Solé, R. V.; Elena, S. F., The Fittest versus the Flattest: Experimental Confirmation of the Quasispecies Effect with Subviral Pathogens. *PLOS Pathogens* **2006**, *2* (12), e136.
30. Parker, M. T.; Knop, K.; Sherwood, A. V.; Schurch, N. J.; Mackinnon, K.; Gould, P. D.; Hall, A. J. W.; Barton, G. J.; Simpson, G. G., Nanopore direct RNA sequencing maps the complexity of Arabidopsis mRNA processing and m6A modification. *eLife* **2020**, *9*, e49658.
31. Shinde, H.; Dudhate, A.; Kadam, U. S.; Hong, J. C., RNA methylation in plants: An overview. *Frontiers in Plant Science* **2023**, *14*.
32. Manduzio, S.; Kang, H., RNA methylation in chloroplasts or mitochondria in plants. *RNA Biology* **2021**, *18* (12), 2127-2135.
